# Supplementary material for: Alkaline peroxidase activity of cupric oxide nanoparticles and its modulation by ammonia
Source: Royal Society of Chemistry journal article supplement (doi:10.1039/c7an01293d), 2017-01-01
Supplement: c7an01293d1.pdf [file c7an01293d1.pdf]

## Supporting Information

### **Alkaline peroxidase activity of cupric oxide nanoparticles and its modulation by ammonia**

Hao-Hua Deng,<sup>a,b</sup> Xiao-Qing Zheng,<sup>a,b</sup> Yan-Yu Wu,<sup>a,b</sup> Xiao-Qiong Shi,<sup>a,b</sup> Xiu-Ling Lin,<sup>a,b</sup> Xing-Hua Xia,<sup>c</sup> Hua-Ping Peng\*,<sup>a,b</sup> Wei Chen\*,<sup>a,b</sup> Guo-Lin Hong\*<sup>d</sup>

<sup>a</sup> Department of Pharmaceutical Analysis, Fujian Medical University, Fuzhou 350004, China

<sup>b</sup> Higher Educational Key Laboratory for Nano Biomedical Technology of Fujian Province, Fujian Medical University, Fuzhou 350004, China

<sup>c</sup> State Key Laboratory of Analytical Chemistry for Life Science, School of Chemistry and Chemical Engineering, Nanjing University, Nanjing 210093, China.

<sup>d</sup> Department of Laboratory Medicine, the First Affiliated Hospital of Xiamen University, Xiamen 361003, China

\* Corresponding author. Tel./fax: +86 591 22862016.

E-mail address: chenandhu@163.com (W. Chen), phpjmu@126.com (H.P. Peng), 18860089899@139.com (G.L. Hong).

Hao-Hua Deng and Xiao-Qing Zheng contributed equally to this work.

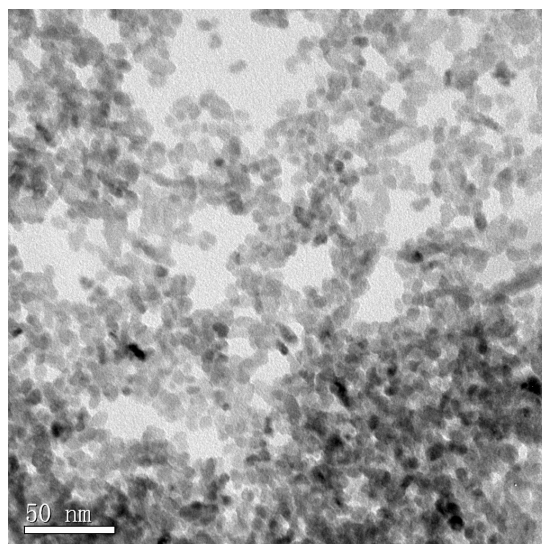

**Fig. S1.** TEM image of CuO NPs.

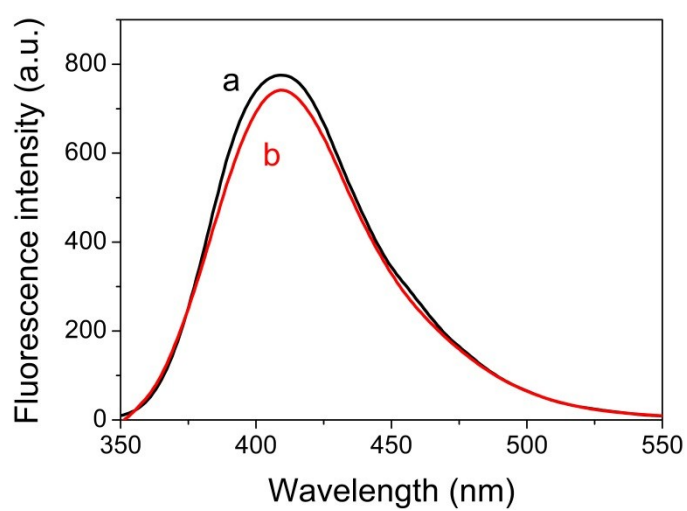

**Fig. S2.** Effect of ammonia on the fluorescence of the HPPA-H<sub>2</sub>O<sub>2</sub>-HRP system. (a) HPPA-H<sub>2</sub>O<sub>2</sub>-HRP, (b) ammonia-HPPA-H<sub>2</sub>O<sub>2</sub>-HRP. The concentration of ammonia was 2.5 mM.
